# Supplementary material for: Revealing Novel Protein Biomarkers for Female Infertility through an Integrated Analysis of Plasma Proteomics and Mendelian Randomization
Source: Research Square preprint supplement (doi:10.21203/rs.3.rs-6313119/v1), 2025-05-08
Supplement: Supplementary file 1 [file 16e43949b16e34e93f001192.docx]

**Revealing Novel Protein Biomarkers for Female Infertility through an Integrated Analysis of Plasma Proteomics and Mendelian Randomization**

**Supplementary** **Figure 1 Protein-Protein Interaction (PPI) Network between Identified Causal Proteins and Implicated Protein Targets.**

**Supplementary Figure 2 Results of Drug-Gene Interaction Analysis.**


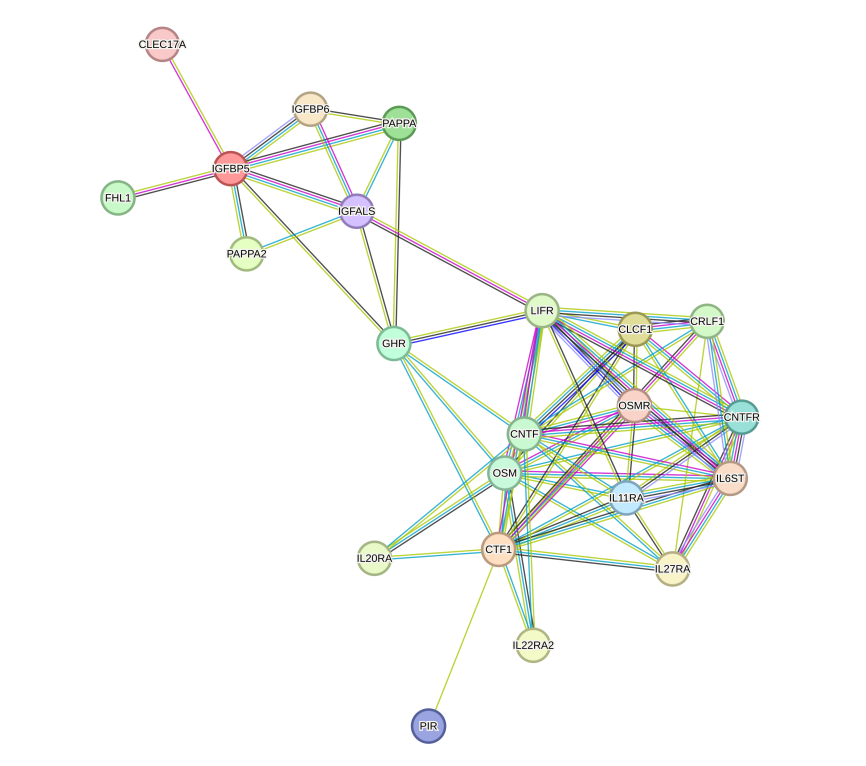


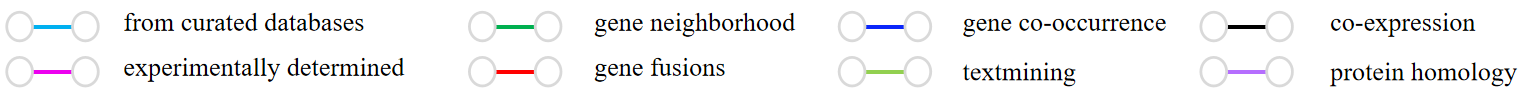


Supplementary Figure 1 Protein-Protein Interaction (PPI) Network between Identified Causal Proteins and Implicated Protein Targets.

1. CTF1 (b) IGFBP5


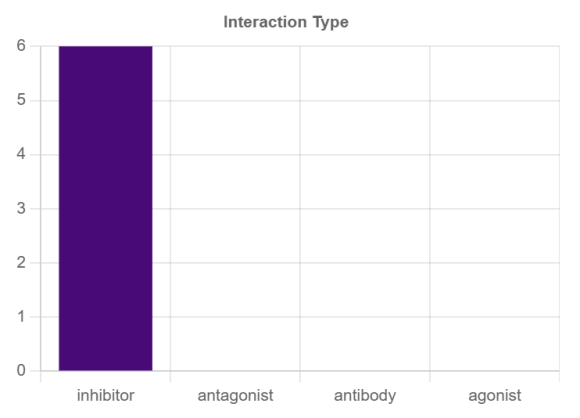

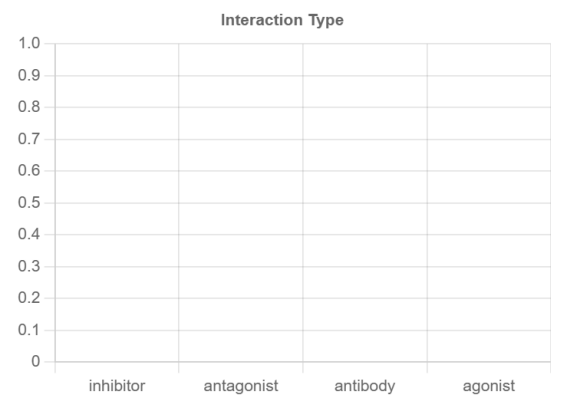


(c) CNTFR (d) IL11RA


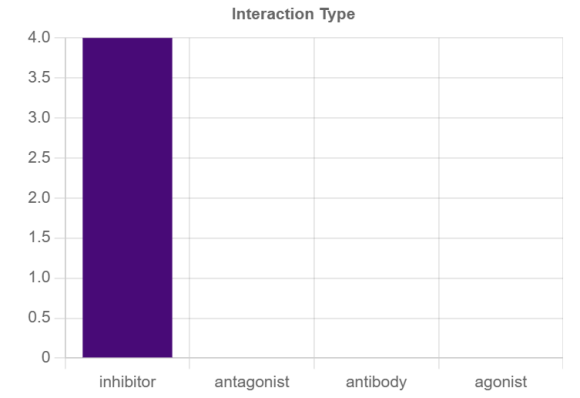

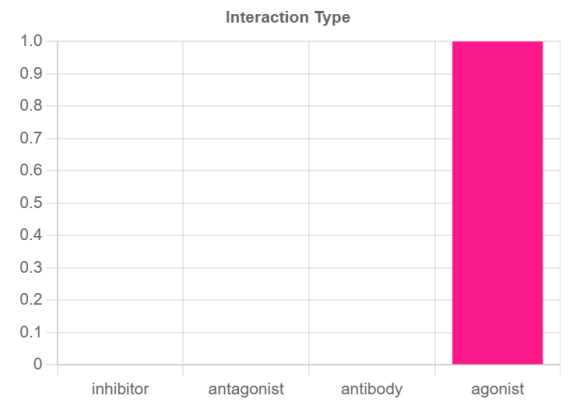


(e) OSMR (g) IL6ST


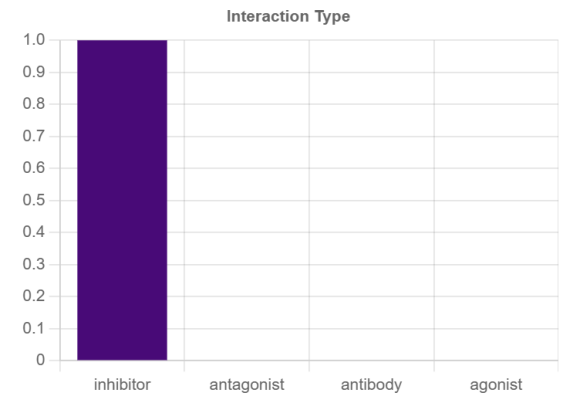

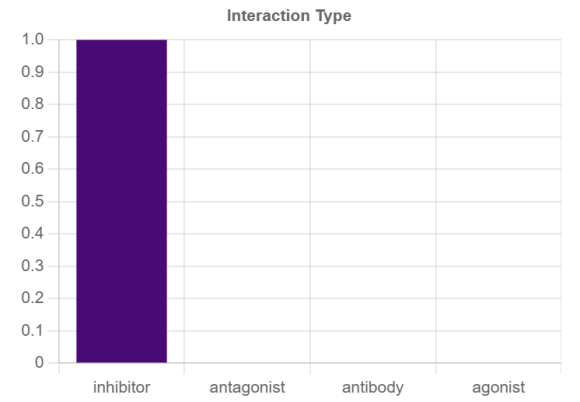


(g) LIFR (h) CNTF


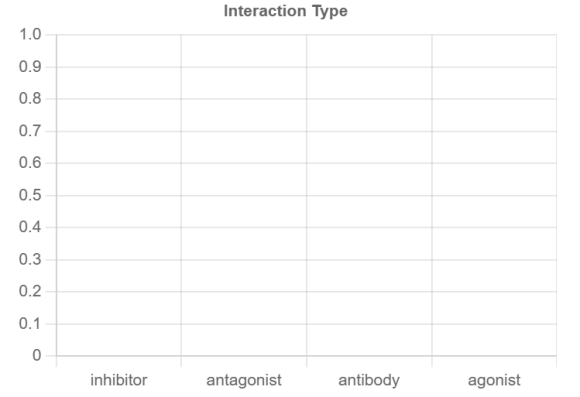

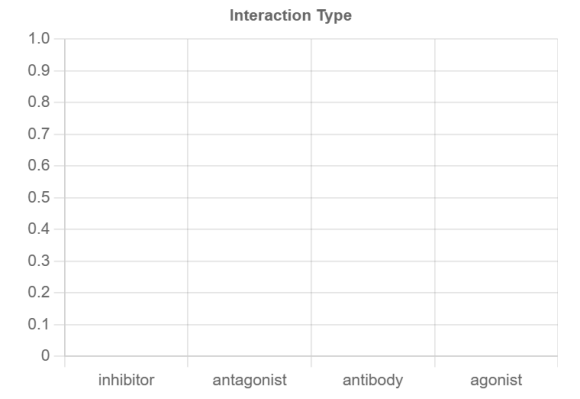


(i) OSM (j) FHL1


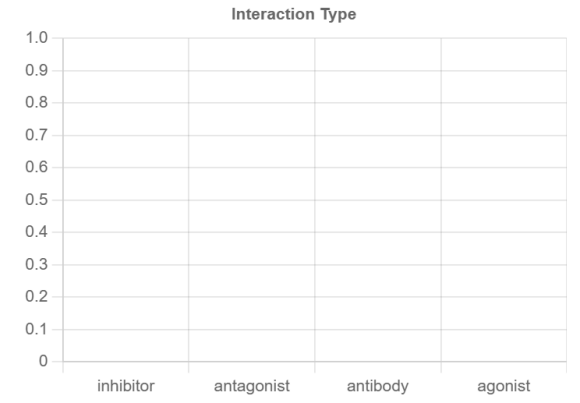

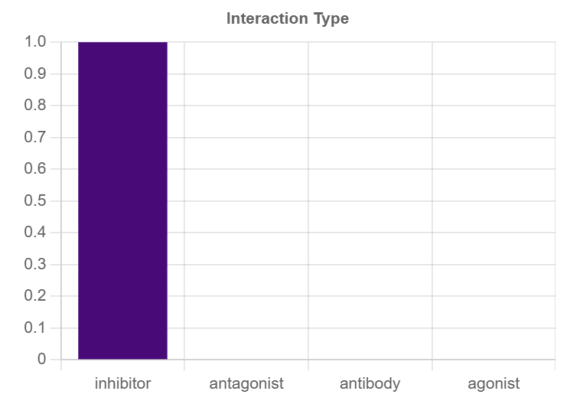


(k) IGFBP6 (l) PAPPA


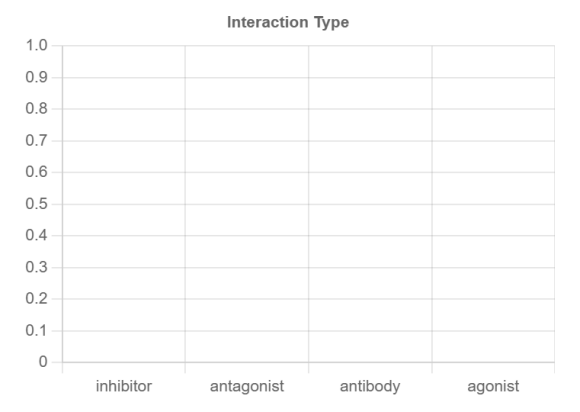

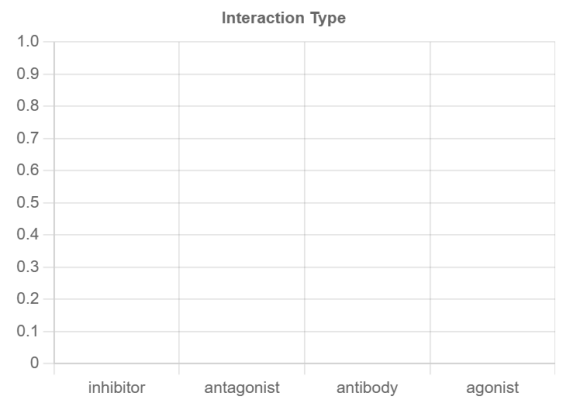


(m) PAPPA2 (n) GHR


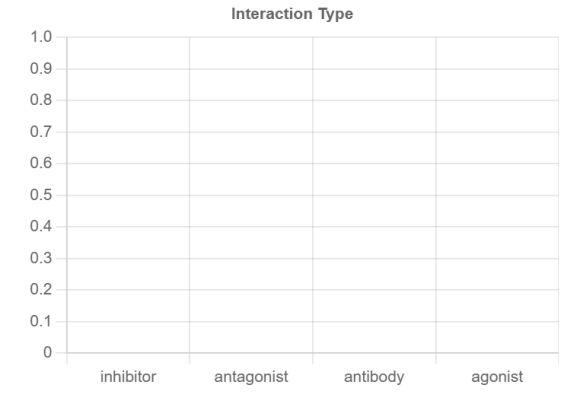

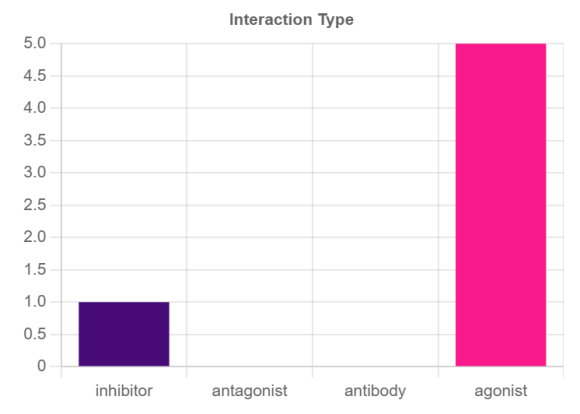


Supplementary Figure 2 Results of Drug-Gene Interaction Analysis. Plasma proteins: CTF1(a), IGFBP5(b), CNTFR(c), IL11RA(d), OSMR(e), IL6ST(g), LIFR(g), CNTF(h), OSM(i), FHL1(j), IGFBP6(k), PAPPA(l), PAPPA2(m), GHR(n). CTF1=Cardiotrophin-1, IGFBP5=Insulin-like growth factor-binding protein 5, CNTFR=Ciliary neurotrophic factor receptor subunit alpha, IL11RA=Interleukin-11 receptor subunit alpha, OSMR=Oncostatin-M-specific receptor subunit beta, IL6ST=Interleukin-6 receptor subunit beta, LIFR=Leukemia inhibitory factor receptor, CNTF=Ciliary neurotrophic factor, OSM=Oncostatin-M , FHL1=Four and a half LIM domains protein 1 , IGFBP6=Insulin-like growth factor-binding protein 6, PAPPA=Pappalysin-1 , PAPPA2=Pappalysin-2 , GHR=Growth hormone-binding protein.
